# Supplementary material for: A hairpin probe-mediated exponential amplification reaction for highly sensitive and specific detection of microRNAs
Source: Royal Society of Chemistry journal article supplement (doi:10.1039/d3cc00241a), 2023-01-01
Supplement: d3cc00241a1.pdf [file d3cc00241a1.pdf]

## Supporting Information

### Hairpin probe-mediated Exponential Amplification Reaction for Highly Sensitive and Specific Detection of microRNAs

Hongyan Yu<sup>a, 1</sup>, Zhi Weng<sup>a, 1</sup>, Xi Zhou<sup>a</sup>, Dan Bai<sup>a</sup>, Wang Luo<sup>a</sup>, Xiaole Han<sup>a</sup>, Lin Song<sup>a</sup>, Qian Liu<sup>a</sup>, Junjie Li<sup>a</sup>, Yujun Yang<sup>a</sup>, Yongcan Guo<sup>c, \*</sup>, Ke Lv<sup>b, \*</sup>, Guoming Xie<sup>a, \*</sup>

*a* Key Laboratory of Clinical Laboratory Diagnostics (Chinese Ministry of Education), College of Laboratory Medicine, Chongqing Medical Laboratory Microfluidics and SPRI Engineering Research Center, Chongqing Medical University, No. 1 Yi Xue Yuan Road, Chongqing 400016, P.R China.

*b* Department of Neurosurgery, The First Affiliated Hospital of Chongqing Medical University, No.1 Youyi Road, Chongqing 40016, P.R China.

*c* Clinical Laboratory of Traditional Chinese Medicine Hospital Affiliated to Southwest Medical University, Luzhou Key Laboratory of Nanobiosensing and Microfluidic Point-of-Care Testing, Luzhou 646000, P.R China.

\*Corresponding author:

Guoming Xie, Key Laboratory of Clinical Laboratory Diagnostics (Chinese Ministry of Education), College of Laboratory Medicine, Chongqing Medical Laboratory Microfluidics and SPRI Engineering Research Center, Chongqing Medical University, No. 1 Yi Xue Yuan Road, Chongqing 400016, P.R China.

E-mail address: [guomingxie@cqmu.edu.cn](mailto:guomingxie@cqmu.edu.cn), [xielm059@foxmail.com](mailto:xielm059@foxmail.com)

Tel.: +86 23 68485240; Fax.: +86 23 68485239

Ke Lv, Department of Neurosurgery, The First Affiliated Hospital of Chongqing Medical University, No.1 Youyi Road, Chongqing 40016, P.R China.

E-mail: [sxccq2021@163.com](mailto:sxccq2021@163.com)

Yongcan Guo, Luzhou Key Laboratory of Nanobiosensing and Microfluidic Point-of-

28 *Care Testing, Clinical Laboratory of Traditional Chinese Medicine Hospital Affiliated*  
29 *to Southwest Medical University, Luzhou 646000, P.R China.*

30 *E-mail: swtcmlab@163.com*

31 Hongyan Yu, and Zhi Weng contributed equally to this work.

32

### 33 **Materials and reagents**

34 All the oligonucleotides used in this work were synthesized by Sangon Biotech  
35 Inc. (Shanghai, China) with HPLC purification (corresponding sequences are listed in  
36 Table S1). Bst DNA Polymerase (Large Fragment), Nt.BsmAI, CutSmart buffer (20  
37 mM Tris-acetate, 50 mM potassium acetate, 10 mM magnesium acetate and 100 mg/ml  
38 BSA, pH 7.9) were ordered from New England Biolabs (New England, USA).  
39 Deoxynucleotide triphosphates (dNTPs), SYBR Green, diethylpyrocarbonate (DEPC)-  
40 treated water, 8 strip real-time PCR tubes and TBE solution were purchased from  
41 Sangon Biotech Inc. (Shanghai, China). DNA loading buffer (6×) and Gel Red nucleic  
42 acid dye were ordered from TaKaRa Biotech (Dalian, China). The human serum was  
43 obtained from the First Affiliated Hospital of Chongqing Medical University.

### 44 **Apparatus and instruments**

45 Gel images were obtained on electrophoresis apparatus (DYY-6C, LIUYI, China)  
46 and imaging system (Bio-Rad Laboratories, USA). PCR assay was conducted by real-  
47 time PCR instrument (CFX96, Bio-Rad, USA). All chemical reagents were of  
48 analytical grade, and RNase-free water was used throughout this study.

### 49 **Experimental section**

#### 50 **PAGE analysis of HEAR**

51 The reaction solution (20μL) was prepared separately as a part A solution and part  
52 B solution. The part A solution consisted of miRNA (10 nM), H1 (200 nM), and H2  
53 (200 nM). The part B solution consisted of dNTP (250 μM), Bst DNA Polymerase (1.6  
54 U), Nt.BsmAI nicking endonuclease (5 U), CutSmart buffer (1×), SYBR I (2×), and  
55 RNase-free. At first, the part A solution was incubated at room temperature for 5  
56 minutes. Subsequently, part A and part B were mixed, the polymerization reaction was  
57 performed at 43 °C for 15 min.

58 Products of reactions were analyzed by running in a 12% native polyacrylamide  
59 gel. Electrophoresis was performed in 1× TBE buffer (2 mM EDTA and 89 mM Tris-  
60 boric acid, pH 8.3) at a 100 V constant voltage for 60 min before staining with 4S  
61 GelRed. Finally, the gel was visualized via a gel image system.

#### 62 **Real-time Fluorescence Measurement of HEAR and PEAR.**

63 To detect different concentrations of miRNA, the part A solution consisted of H1  
64 or P1 (200 nM), and H2 (200 nM). The part B solution consisted of dNTP (250  $\mu$ M),  
65 Bst DNA Polymerase (1.6 U), Nt.BsmAI nicking endonuclease (5 U), CutSmart buffer  
66 (1 $\times$ ), SYBR I (2 $\times$ ), and RNase-free. Firstly, the part A solution was incubated at room  
67 temperature for 5 minutes. Subsequently, part A and part B were mixed at 43  $^{\circ}$ C, and  
68 the fluorescence intensity was monitored at intervals of 30 seconds by a CFX96<sup>TM</sup> Real-  
69 Time PCR Detection System with the SYBR filter set.

70

71 **Table S1.** Sequences of the designed oligonucleotides.

| Oligonucleotides | Sequence (from 5' to 3' )                       |
|------------------|-------------------------------------------------|
| let7a            | UGAGGUAGUAGGUUGUAUAGUU                          |
| let7b            | UGAGGUAGUAGGUUGUGUGGUU                          |
| let7c            | UGAGGUAGUAGGUUGUAUGGUU                          |
| let7d            | AGAGGUAGUAGGUUGCAUAGUU                          |
| let7e            | UGAGGUAGGAGGUUGUAUAGUU                          |
| let7f            | UGAGGUAGUAGAUUGUAUAGUU                          |
| let7g            | UGAGGUAGUAGUUUGUACAGUU                          |
| let7i            | UGAGGUAGUAGUUUGUGCUGUU                          |
| Primer of PEAR:  |                                                 |
| P1               | CGGAGTCTCT ↓ <u>AACTATACAACCAAAA</u> -p         |
| P2               | CGGAGTCTCT ↓ <u>TGAGGTAGTAGGAAAA</u> -p         |
| Hairpin of HEAR: |                                                 |
| H1(6bp stem)     | TATAGTTGTCTCT ↓ <u>AACTATACAACCAAAA</u> -p      |
| H2(6bp stem)     | ACCTCAGTCTCT ↓ <u>TGAGGTAGTAGGAAAA</u> -p       |
| H3(6+1bp stem)   | ATAGTTGGTCTCT ↓ <u>CAACTATACAACCAAAA</u> -p     |
| H4(6+1bp stem)   | ACCTCAGGTCTCT ↓ <u>CTGAGGTAGTAGGAAAA</u> -p     |
| H5(6+2bp stem)   | ATAGTTTGGTCTCT ↓ <u>CAA</u> ACTATACAACCAAAA-p   |
| H6(6+2bp stem)   | ACCTCATGGTCTCT ↓ <u>CAT</u> GAGGTAGTAGGAAAA-p   |
| H5(6+3bp stem)   | ATAGTTGTGGTCTCT ↓ <u>CACA</u> ACTATACAACCAAAA-p |
| H6(6+3bp stem)   | ACCTCAGTGGTCTCT ↓ <u>CACT</u> GAGGTAGTAGGAAAA-p |

72 Note:

73 [a] The sequence underlined is the recognition site of the nicking enzyme Nt.BsmAI.

74 [b] " ↓ " represents the cleavage site.

75 [c] The 'p' indicates as phosphate group.

76

77 **Table S2** Comparison of analytical performance for miRNA detection methods.

| Method                                 | Analytes | One-step<br>reaction | Linear range                 | Detection limit | Reference |
|----------------------------------------|----------|----------------------|------------------------------|-----------------|-----------|
| Fluorescent assay                      | miR-141  | Yes                  | 100 pM-100 nM                | 100 fM          | 1         |
| Fluorescent assay                      | miR-21   | Yes                  | 10 fM-1 nM                   | 10 fM           | 2         |
| Fluorescent assay                      | miR-21   | Yes                  | 1 fM-100 pM                  | 100 aM          | 3         |
| Fluorescent assay                      | miR-21   | no                   | 10 fM-10 pM, 10<br>pM-100 nM | 10 fM           | 4         |
| Fluorescent assay                      | miR-21   | no                   | 100 aM-100 pM                | 70 aM           | 5         |
| Fluorescent assay                      | miR-21   | /                    | 150 pM-37.5 nM               | 130 pM          | 6         |
| Fluorescent assay                      | Let7a    | no                   | 100 aM-10 nM                 | 84.5 aM         | 7         |
| Fluorescent and visual<br>assay        | Let7a    | no                   | 100 aM -10 pM                | 100 aM          | 8         |
| TIRFM                                  | Let7a    | no                   | 0–25 pM                      | 500 fM          | 9         |
| Electrochemical assay                  | miR-21   | no                   | 1 pM-10 nM                   | 260 fM          | 10        |
| Electrochemiluminesc<br>ence assay     | miR-21   | no                   | 1 fM-100 pM                  | 650 aM          | 11        |
| Electrochemiluminesc<br>ence assay     | miR-21   | no                   | 10 fM-100 pM                 | 6.6 fM          | 12        |
| Surface-enhanced<br>Raman spectroscopy | miR-21   | no                   | 1 fM-100 pM                  | 393 aM          | 13        |
| Fluorescent assay                      | Let7a    | yes                  | 100 aM-10 nM                 | 19 aM           | This work |

78

79

80

81

82 **Supplementary Figures**

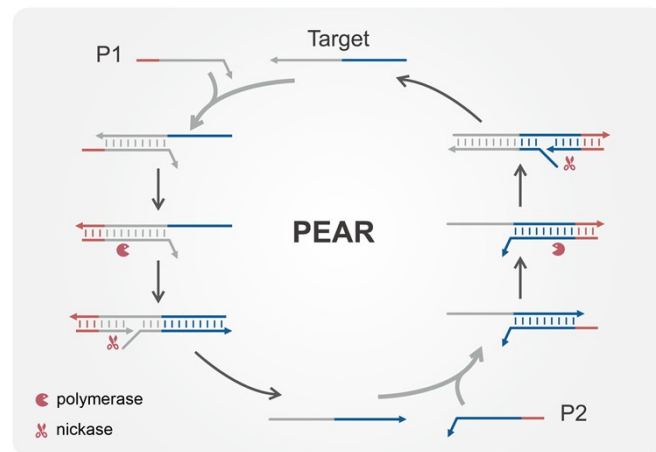

83 **Figure S1.** Schematic illustration of primer probe-mediated exponential amplification  
84 reaction (PEAR)

85

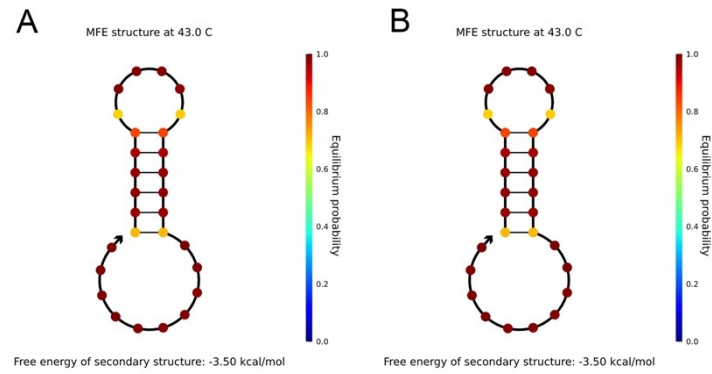

86 **Figure S2.** Minimum free energy (MFE) structure of (A) H1 and (B) H2 at 43 °C. The  
 87 MFE structures were analyzed by NUPACK web server (<http://www.nupack.org/>).  
 88

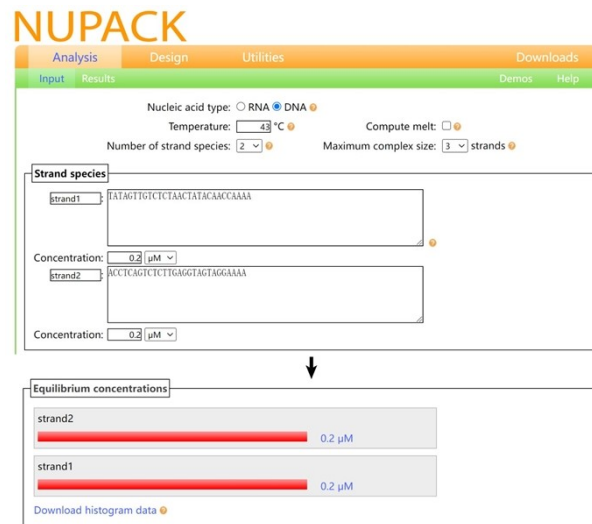

89 **Figure S3.** Simulation of hybridization between H1 and H2 through NUPACK  
 90 software (<http://www.nupack.org/>).  
 91

92 The reaction temperature is essential to the strand displacement reaction and enzyme  
93 activity. As illustrated in Fig. S4, although the difference between positive and negative  
94 signals were similar at different temperatures, the fastest reaction efficiency was seen  
95 at 43°C. Therefore, 43°C was selected as the reaction temperature in the following  
96 study.

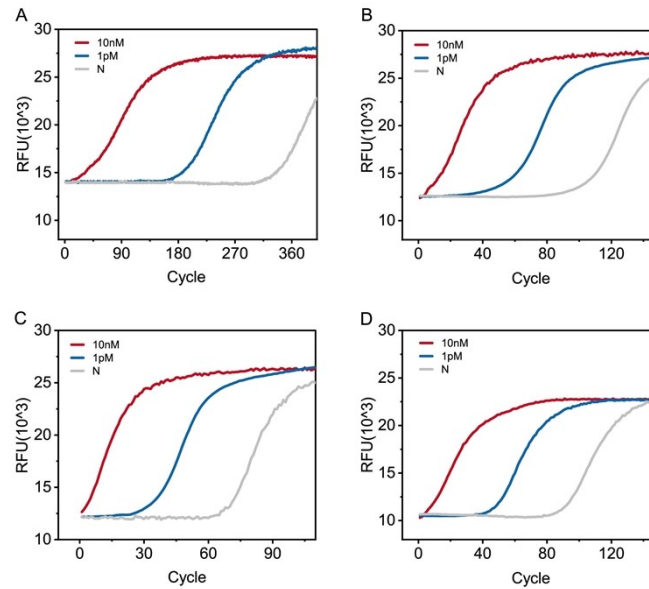

97 **Figure S4.** The effect of temperature on HEAR. Real-time fluorescence quantitative  
98 curves were generated at (A) 30°C (B) 37°C (C) 43°C and (D) 50°C, respectively.  
99

100 The enzyme concentration directly affects speed of the enzyme-based isothermal  
 101 amplification reactions and the generation of non-specific signals to a large extent.  
 102 Although the precise mechanism of the interaction between nicking endonuclease and  
 103 polymerase is not well understood, it is possible to simply modulate the reaction by  
 104 changing the concentration of the enzymes. When the concentration of the immobilized  
 105 polymerase was 1.6 U, the real-time fluorescence curves of 10 U, 5 U, 2.5 U and 1.25  
 106 U nicking endonuclease concentrations were measured respectively (Fig. S5). At the  
 107 same time, when the concentration of nicking endonuclease was fixed at 5 U, the real-  
 108 time fluorescence curves of 3.2 U, 1.6 U, 0.8 U and 0.4 U polymerase were measured  
 109 respectively (Fig. S6). It can be seen from Fig. S5-6 that the reaction speed became  
 110 faster with the increase of enzyme concentration, and the POI difference between  
 111 negative and positive signals was similar, indicating that the strand displacement  
 112 reaction and the design of poly(A) effectively hindered the generation of non-specific  
 113 signals. We next performed real-time fluorescence quantitative detection of different  
 114 concentrations of miRNA under high concentrations of polymerase (3.2 U polymerase,  
 115 5 U nicking endonuclease), and plotted the correlation linear curve (Fig. S7).  
 116 Considering the reaction performance and cost, 5U nicking endonuclease and 1.6U  
 117 polymerase were selected for the following experiments.

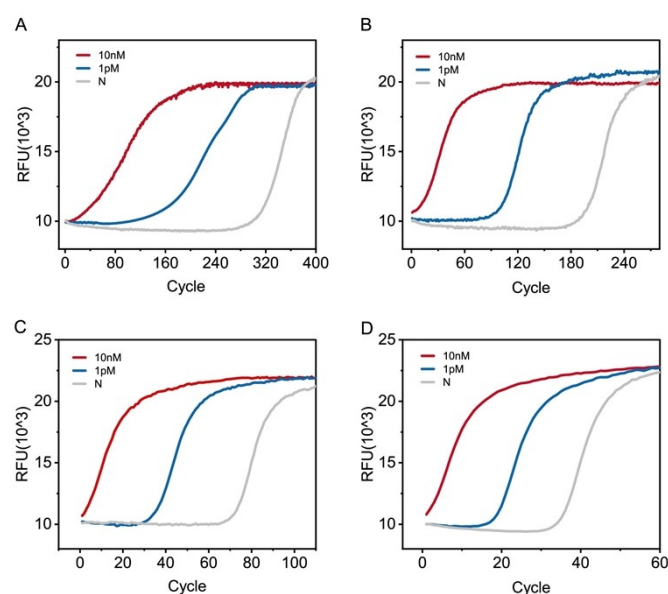

118 **Figure S5.** The effect of nicking endonuclease concentrations on HEAR. Real-time  
 119 fluorescence quantitative curves were generated at (A) 1.25 U (B) 2.5 U (C) 5 U and  
 120 (D) 10 U, respectively.

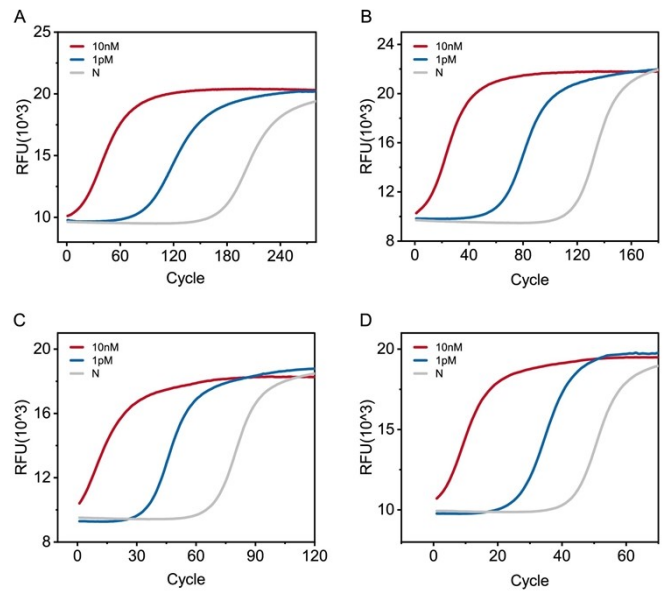

121 **Figure S6.** The effect of polymerase concentrations on HEAR. Real-time fluorescence  
 122 quantitative curves were generated at (A) 0.4 U (B) 0.8 U (C) 1.6 U and (D) 3.2 U,  
 123 respectively.

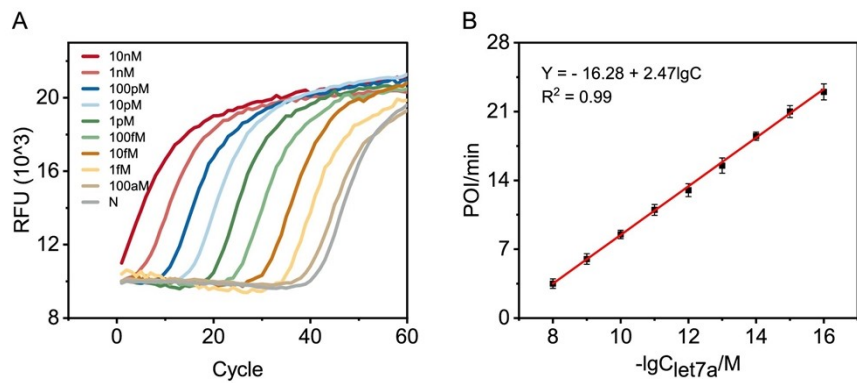

125 **Figure S7.** (A) Real-time fluorescence quantitative curve of HEAR triggered by  
 126 different miRNAs at high concentrations of polymerase (3.2U). (B) Linear relationship  
 127 between POI of HEAR and logarithm of miRNA concentration.

131 In general, when the Gibbs free energy change of the reaction approaches 0 kcal/mol,  
 132 such as branch migration reactions, even a single base mismatch that causes a small  
 133 thermodynamic change can cause enough thermodynamic difference and reduce the  
 134 yield compared to matching target.<sup>31</sup> Therefore, we wondered whether increasing the  
 135 stem length of the hairpin could achieve increased specificity of HEAR. 1, 2 and 3  
 136 base pairs were added between stem and loop for testing. As shown in Fig. S8, as the  
 137 number of bases increased, the amplification efficiency became lower. We speculated  
 138 that it may be due to the difficulty in opening the hairpin after adding bases, and the  
 139 low yield caused by its reversibility. Therefore, we still chose not to add additional  
 140 base pairs between the loop and the stem.

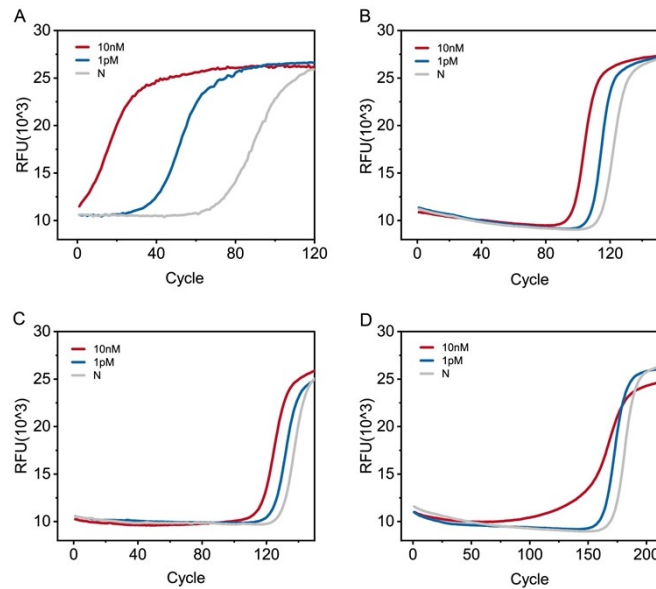

141 **Figure S8.** Effects of hairpin stem length on HEAR. (A) Real-time fluorescence  
 142 quantitative curves triggered by hairpins for 6nt (B) 6+1bp (C) 6+2bp and (D) 6+3bp  
 143 stem lengths.

144

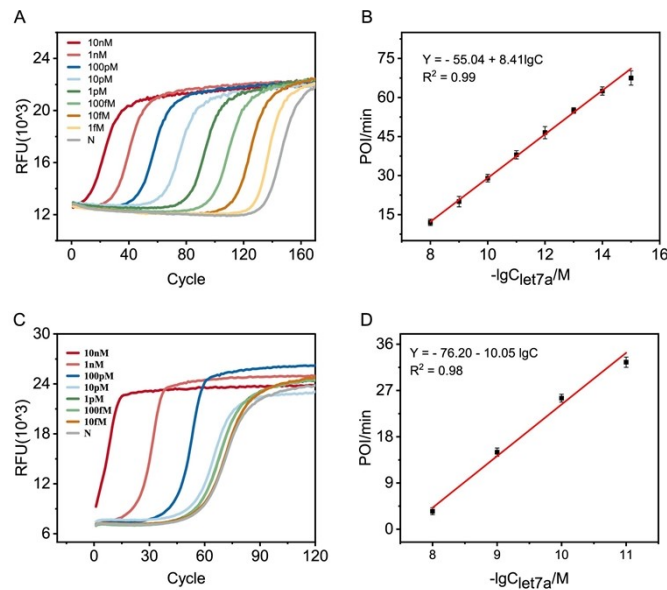

145 **Figure S9.** (A) Real-time fluorescence quantitative curve of HEAR triggered by  
146 different miRNAs at 37°C. (B) Linear relationship between POI of HEAR and  
147 logarithm of miRNA concentration. (C) Real-time fluorescence quantitative curve of  
148 PEAR triggered by different miRNAs at 37°C. (D) Linear relationship between POI of  
149 PEAR and logarithm of miRNA concentration.

150 Reference:

- 151 1. B. C. Yin, Y. Q. Liu and B. C. Ye, *J. Am. Chem. Soc.*, 2012, **134**, 5064-5067.
- 152 2. R. Duan, X. Zuo, S. Wang, X. Quan, D. Chen, Z. Chen, L. Jiang, C. Fan and F. Xia, *J. Am. Chem. Soc.*,  
153 2013, **135**, 4604-4607.
- 154 3. C. Yuan, J. Fang, X. Luo, Y. Zhang, G. Huang, X. Zeng, K. Xia, M. Li, X. Chen, X. Yang, M. L. de la  
155 Chapelle and W. Fu, *Anal. Chim. Acta.*, 2022, **1203**, 339706.
- 156 4. X. Chen, Y. Deng, G. Cao, Y. Xiong, D. Huo and C. Hou, *Chem. Commun. (Camb)*, 2021, **57**, 6129-6132.
- 157 5. S. Peng, Z. Tan, S. Chen, C. Lei and Z. Nie, *Chem. Sci.*, 2020, **11**, 7362-7368.
- 158 6. J. Su, F. Wu, H. Xia, Y. Wu and S. Liu, *Chem. Sci.*, 2020, **11**, 80-86.
- 159 7. C. C. Li, J. Hu, X. Zou, X. Luo and C. Y. Zhang, *Anal. Chem.*, 2022, **94**, 1882-1889.
- 160 8. M. Zhang, H. Wang, H. Wang, F. Wang and Z. Li, *Anal. Chem.*, 2021, **93**, 7942-7948.
- 161 9. Y. Qi, Y. Zhai, W. Fan, W. Ren, Z. Li and C. Liu, *Anal. Chem.*, 2021, **93**, 1620-1626.
- 162 10. D. Zhu, W. Liu, D. Zhao, Q. Hao, J. Li, J. Huang, J. Shi, J. Chao, S. Su and L. Wang, *ACS Appl. Mater.*  
163 *Interfaces.*, 2017, **9**, 35597-35603.
- 164 11. Y. Xia, T. Chen, L. Zhang, X. Zhang, W. Shi, G. Chen, W. Chen, J. Lan, C. Li, W. Sun and J. Chen,  
165 *Biosens. Bioelectron.*, 2021, **173**, 112834.
- 166 12. P. Zhang, J. Jiang, R. Yuan, Y. Zhuo and Y. Chai, *J. Am. Chem. Soc.*, 2018, **140**, 9361-9364.
- 167 13. C. Y. Song, Y. J. Yang, B. Y. Yang, Y. Z. Sun, Y. P. Zhao and L. H. Wang, *Nanoscale*, 2016, **8**, 17365-  
168 17373.

169
